# Supplementary material for: The parietal architecture binding cognition to sensorimotor integration: a multimodal causal study
Source: PubMed Central journal article supplement (PMC10766244; doi:10.1093/brain/awad316), 2023-09-16
Supplement: awad316_supplementary_data.pdf [file awad316_supplementary_data.pdf]

Supplementary Table I Scores and Clinical Data

| Pt          | ARAT          |      |       |              | De Renzi      |          |              | De Renzi        | De Renzi     | ARAT            | ARAT         | GRADE | Localization |
|-------------|---------------|------|-------|--------------|---------------|----------|--------------|-----------------|--------------|-----------------|--------------|-------|--------------|
|             | early post-op |      |       |              | early post-op |          |              | 1 month post-op | pre-op       | 1 month post-op | pre-op       |       |              |
|             | grasp         | grip | pinch | global score | meanful       | meanless | global score | global score    | global score | global score    | global score |       |              |
| <b>Pt1</b>  | 18            | 12   | 18    | 48           | 36            | 36       | 72           | 72              | 72           | 48              | 48           | other | P            |
| <b>Pt2</b>  | 18            | 12   | 18    | 48           | 36            | 36       | 72           | 72              | 72           | 48              | 48           | HGG   | F            |
| <b>Pt3</b>  | 18            | 12   | 18    | 48           | 36            | 36       | 72           | 72              | 72           | 48              | 48           | LGG   | P            |
| <b>Pt4</b>  | 18            | 12   | 18    | 48           | 36            | 36       | 72           | 72              | 72           | 48              | 48           | HGG   | F            |
| <b>Pt5</b>  | 18            | 12   | 18    | 48           | 36            | 36       | 72           | 72              | 72           | 48              | 48           | LGG   | F            |
| <b>Pt6</b>  | 18            | 12   | 18    | 48           | 36            | 36       | 72           | 72              | 72           | 48              | 48           | other | P            |
| <b>Pt7</b>  | 18            | 12   | 18    | 48           | 36            | 36       | 72           | 72              | 72           | 48              | 48           | HGG   | T            |
| <b>Pt8</b>  | 18            | 12   | 18    | 48           | 36            | 36       | 72           | 72              | 72           | 48              | 48           | HGG   | F-T          |
| <b>Pt9</b>  | 18            | 12   | 18    | 48           | 36            | 36       | 72           | 72              | 72           | 48              | 48           | HGG   | T-P          |
| <b>Pt10</b> | 18            | 12   | 18    | 48           | 36            | 36       | 72           | 72              | 72           | 48              | 48           | LGG   | T-P          |
| <b>Pt11</b> | 18            | 12   | 18    | 48           | 36            | 36       | 72           | 72              | 72           | 48              | 48           | HGG   | T            |
| <b>Pt12</b> | 18            | 12   | 18    | 48           | 36            | 36       | 72           | 72              | 72           | 48              | 48           | LGG   | T-P          |
| <b>Pt13</b> | 18            | 12   | 18    | 48           | 36            | 36       | 72           | 72              | 72           | 48              | 48           | LGG   | T-P          |
| <b>Pt14</b> | 18            | 12   | 18    | 48           | 36            | 36       | 72           | 72              | 72           | 48              | 48           | HGG   | T            |
| <b>Pt15</b> | 18            | 12   | 18    | 48           | 36            | 36       | 72           | 72              | 72           | 48              | 48           | LGG   | T            |
| <b>Pt16</b> | 18            | 12   | 18    | 48           | 36            | 36       | 72           | 72              | 72           | 48              | 48           | HGG   | T-P          |
| <b>Pt17</b> | 18            | 12   | 18    | 48           | 36            | 36       | 72           | 72              | 72           | 48              | 48           | HGG   | T            |
| <b>Pt18</b> | 18            | 12   | 18    | 48           | 36            | 36       | 72           | 72              | 72           | 48              | 48           | HGG   | F            |

**Supplementary Table I Scores and Clinical Data**

|             |    |    |    |    |    |    |    |    |    |    |    |       |     |
|-------------|----|----|----|----|----|----|----|----|----|----|----|-------|-----|
| <b>Pt19</b> | 18 | 12 | 18 | 48 | 36 | 36 | 72 | 72 | 72 | 48 | 48 | HGG   | F-T |
| <b>Pt20</b> | 18 | 12 | 18 | 48 | 36 | 36 | 72 | 72 | 72 | 48 | 48 | HGG   | T   |
| <b>Pt21</b> | 18 | 12 | 18 | 48 | 36 | 36 | 72 | 72 | 72 | 48 | 48 | LGG   | F-T |
| <b>Pt22</b> | 18 | 12 | 18 | 48 | 36 | 36 | 72 | 72 | 72 | 48 | 48 | LGG   | T-P |
| <b>Pt23</b> | 18 | 12 | 18 | 48 | 36 | 36 | 72 | 68 | 72 | 48 | 48 | HGG   | P   |
| <b>Pt24</b> | 18 | 12 | 18 | 48 | 36 | 36 | 72 | 72 | 72 | 48 | 48 | HGG   | T-P |
| <b>Pt25</b> | 18 | 12 | 18 | 48 | 36 | 36 | 72 | 72 | 72 | 48 | 48 | LGG   | F   |
| <b>Pt26</b> | 18 | 12 | 18 | 48 | 36 | 36 | 72 | 72 | 72 | 48 | 48 | HGG   | T   |
| <b>Pt27</b> | 18 | 12 | 18 | 48 | 36 | 36 | 72 | 72 | 72 | 48 | 48 | LGG   | F-T |
| <b>Pt28</b> | 18 | 12 | 18 | 48 | 36 | 36 | 72 | 72 | 72 | 48 | 48 | HGG   | T   |
| <b>Pt29</b> | 18 | 12 | 18 | 48 | 36 | 36 | 72 | 72 | 72 | 48 | 48 | LGG   | P   |
| <b>Pt30</b> | 18 | 12 | 18 | 48 | 36 | 36 | 72 | 72 | 72 | 48 | 48 | LGG   | T   |
| <b>Pt31</b> | 18 | 12 | 18 | 48 | 36 | 36 | 72 | 72 | 72 | 48 | 48 | LGG   | P   |
| <b>Pt32</b> | 18 | 12 | 18 | 48 | 36 | 36 | 72 | 72 | 72 | 48 | 48 | LGG   | F   |
| <b>Pt33</b> | 18 | 12 | 18 | 48 | 36 | 36 | 72 | 72 | 72 | 48 | 48 | HGG   | T   |
| <b>Pt34</b> | 18 | 12 | 18 | 48 | 36 | 36 | 72 | 69 | 72 | 48 | 48 | HGG   | P   |
| <b>Pt35</b> | 18 | 12 | 18 | 48 | 36 | 36 | 72 | 72 | 72 | 45 | 48 | LGG   | T   |
| <b>Pt36</b> | 18 | 12 | 18 | 48 | 36 | 36 | 72 | 72 | 72 | 47 | 48 | HGG   | P   |
| <b>Pt37</b> | 18 | 12 | 18 | 48 | 36 | 36 | 72 | 72 | 72 | 48 | 48 | LGG   | P   |
| <b>Pt38</b> | 18 | 12 | 18 | 48 | 36 | 36 | 72 | 72 | 72 | 48 | 48 | LGG   | F   |
| <b>Pt39</b> | 18 | 12 | 18 | 48 | 36 | 36 | 72 | 72 | 72 | 47 | 48 | HGG   | T   |
| <b>Pt40</b> | 18 | 12 | 18 | 48 | 35 | 35 | 70 | 72 | 72 | 48 | 48 | HGG   | T   |
| <b>Pt41</b> | 18 | 12 | 18 | 48 | 35 | 35 | 70 | 68 | 69 | 48 | 48 | other | F   |

**Supplementary Table I Scores and Clinical Data**

|             |    |    |    |    |    |    |    |    |    |    |    |       |     |
|-------------|----|----|----|----|----|----|----|----|----|----|----|-------|-----|
| <b>Pt42</b> | 18 | 12 | 18 | 48 | 36 | 34 | 70 | 68 | 72 | 48 | 48 | LGG   | F   |
| <b>Pt43</b> | 18 | 12 | 18 | 48 | 36 | 34 | 70 | 72 | 72 | 48 | 48 | HGG   | F   |
| <b>Pt44</b> | 18 | 12 | 18 | 48 | 35 | 35 | 70 | 72 | 72 | 48 | 48 | LGG   | F-T |
| <b>Pt45</b> | 18 | 12 | 18 | 48 | 35 | 35 | 70 | 72 | 72 | 48 | 48 | HGG   | T   |
| <b>Pt46</b> | 18 | 12 | 18 | 48 | 35 | 35 | 70 | 72 | 72 | 48 | 48 | HGG   | F-T |
| <b>Pt47</b> | 18 | 12 | 18 | 48 | 35 | 35 | 70 | 72 | 72 | 48 | 48 | other | P   |
| <b>Pt48</b> | 18 | 12 | 18 | 48 | 35 | 35 | 70 | 70 | 72 | 48 | 48 | LGG   | F   |
| <b>Pt49</b> | 18 | 12 | 18 | 48 | 36 | 33 | 69 | 72 | 68 | 48 | 48 | LGG   | T   |
| <b>Pt50</b> | 18 | 12 | 18 | 48 | 35 | 34 | 69 | 70 | 72 | 48 | 48 | HGG   | F   |
| <b>Pt51</b> | 18 | 12 | 18 | 48 | 36 | 31 | 67 | 67 | 72 | 48 | 48 | HGG   | T   |
| <b>Pt52</b> | 18 | 12 | 18 | 48 | 32 | 35 | 67 | 69 | 72 | 48 | 48 | LGG   | T-P |
| <b>Pt53</b> | 18 | 12 | 18 | 48 | 36 | 30 | 66 | 70 | 70 | 48 | 48 | HGG   | F-T |
| <b>Pt54</b> | 18 | 12 | 18 | 48 | 36 | 30 | 66 | 72 | 72 | 48 | 48 | LGG   | P   |
| <b>Pt55</b> | 18 | 12 | 18 | 48 | 30 | 36 | 66 | 66 | 70 | 48 | 48 | HGG   | T   |
| <b>Pt56</b> | 18 | 12 | 18 | 48 | 30 | 31 | 61 | 64 | 69 | 48 | 48 | HGG   | F   |
| <b>Pt57</b> | 18 | 12 | 18 | 48 | 27 | 26 | 53 | 72 | 72 | 48 | 48 | HGG   | F   |
| <b>Pt58</b> | 18 | 12 | 18 | 48 | 25 | 26 | 51 | 72 | 72 | 48 | 48 | HGG   | T-P |
| <b>Pt59</b> | 18 | 12 | 18 | 48 | 32 | 21 | 50 | 55 | 72 | 48 | 48 | HGG   | P   |
| <b>Pt60</b> | 18 | 12 | 18 | 48 | 16 | 14 | 30 | 67 | 72 | 48 | 48 | HGG   | P   |
| <b>Pt61</b> | 18 | 12 | 17 | 47 | 35 | 35 | 70 | 72 | 72 | 48 | 48 | HGG   | F-T |
| <b>Pt62</b> | 18 | 12 | 17 | 47 | 36 | 33 | 69 | 72 | 72 | 48 | 48 | HGG   | F-T |
| <b>Pt63</b> | 18 | 12 | 17 | 47 | 28 | 16 | 44 | 44 | 62 | 48 | 48 | HGG   | P   |
| <b>Pt64</b> | 18 | 12 | 17 | 47 | 20 | 23 | 43 | 72 | 72 | 48 | 48 | HGG   | P   |

**Supplementary Table I Scores and Clinical Data**

|             |    |    |    |    |    |    |    |    |    |    |    |     |     |
|-------------|----|----|----|----|----|----|----|----|----|----|----|-----|-----|
| <b>Pt65</b> | 18 | 10 | 18 | 46 | 17 | 13 | 30 | 60 | 72 | 48 | 48 | HGG | P   |
| <b>Pt66</b> | 18 | 12 | 15 | 45 | 36 | 36 | 72 | 72 | 72 | 48 | 48 | HGG | F   |
| <b>Pt67</b> | 18 | 12 | 15 | 45 | 36 | 34 | 70 | 70 | 72 | 45 | 48 | HGG | F   |
| <b>Pt68</b> | 18 | 12 | 15 | 45 | 35 | 27 | 62 | 72 | 61 | 48 | 48 | HGG | T-P |
| <b>Pt69</b> | 18 | 12 | 14 | 44 | 36 | 32 | 68 | 72 | 72 | 48 | 48 | LGG | T-P |
| <b>Pt70</b> | 18 | 11 | 13 | 42 | 36 | 36 | 72 | 72 | 72 | 47 | 48 | HGG | P   |
| <b>Pt71</b> | 18 | 9  | 13 | 40 | 30 | 32 | 62 | 60 | 72 | 34 | 48 | LGG | F   |
| <b>Pt72</b> | 17 | 12 | 10 | 39 | 28 | 27 | 55 | 68 | 72 | 48 | 48 | HGG | P   |
| <b>Pt73</b> | 18 | 12 | 8  | 38 | 21 | 18 | 39 | 72 | 59 | 48 | 48 | HGG | P   |
| <b>Pt74</b> | 16 | 10 | 9  | 35 | 35 | 35 | 70 | 70 | 68 | 48 | 48 | HGG | P   |
| <b>Pt75</b> | 15 | 8  | 12 | 35 | 30 | 18 | 48 | 72 | 72 | 48 | 48 | LGG | P   |
| <b>Pt76</b> | 18 | 8  | 7  | 33 | 30 | 18 | 48 | 67 | 72 | 48 | 48 | HGG | P   |
| <b>Pt77</b> | 16 | 6  | 6  | 28 | 16 | 17 | 33 | 65 | 72 | 48 | 48 | HGG | P   |
| <b>Pt78</b> | 11 | 8  | 7  | 26 | 24 | 17 | 41 | 72 | 70 | 48 | 48 | LGG | F   |
| <b>Pt79</b> | 10 | 4  | 6  | 20 | 31 | 31 | 62 | 68 | 70 | 41 | 48 | HGG | T-P |

Legend  
 Pt = Patient  
 HGG = high grade glioma  
 LGG = low grade glioma  
 Other = meningioma  
 P = Parietal  
 F = Frontal  
 T = Temporal  
 T-P = Temporo-Parietal  
 F-T = Fronto-Temporal
